# Supplementary material
Source: PubMed Central journal article supplement (PMC6608018)

# Supplement Fig. 1

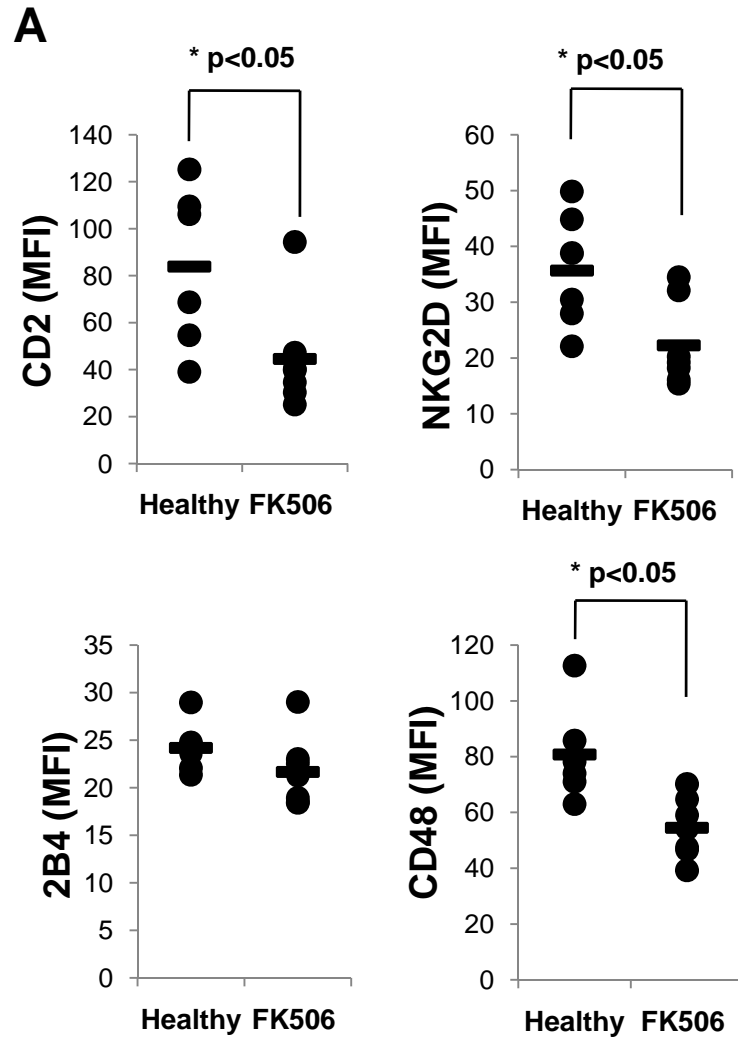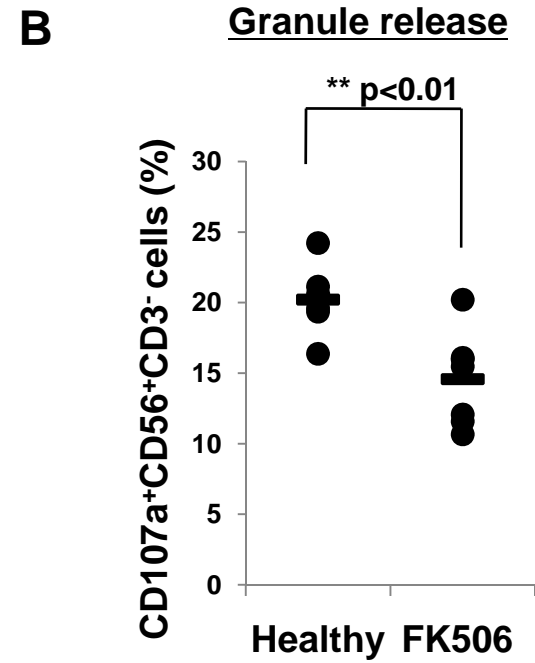

## Characteristics of the patients

| NO | Age (year) / Sex | Disease         | Post Transplantation (months) | Transplantation |
|----|------------------|-----------------|-------------------------------|-----------------|
| 1  | 5/F              | AML             | 5                             | UPBSCT          |
| 2  | 10/M             | AML             | 4                             | UPBSCT          |
| 3  | 13/M             | AML             | 2                             | UPBSCT          |
| 4  | 10/M             | Aplastic Anemia | 3                             | UPBSCT          |
| 5  | 2/F              | HLH             | 4                             | UPBSCT          |
| 6  | 13/M             | AML             | 5                             | UPBSCT          |
| 7  | 16/F             | ALL             | 2                             | UPBSCT          |

# Supplement Fig. 2

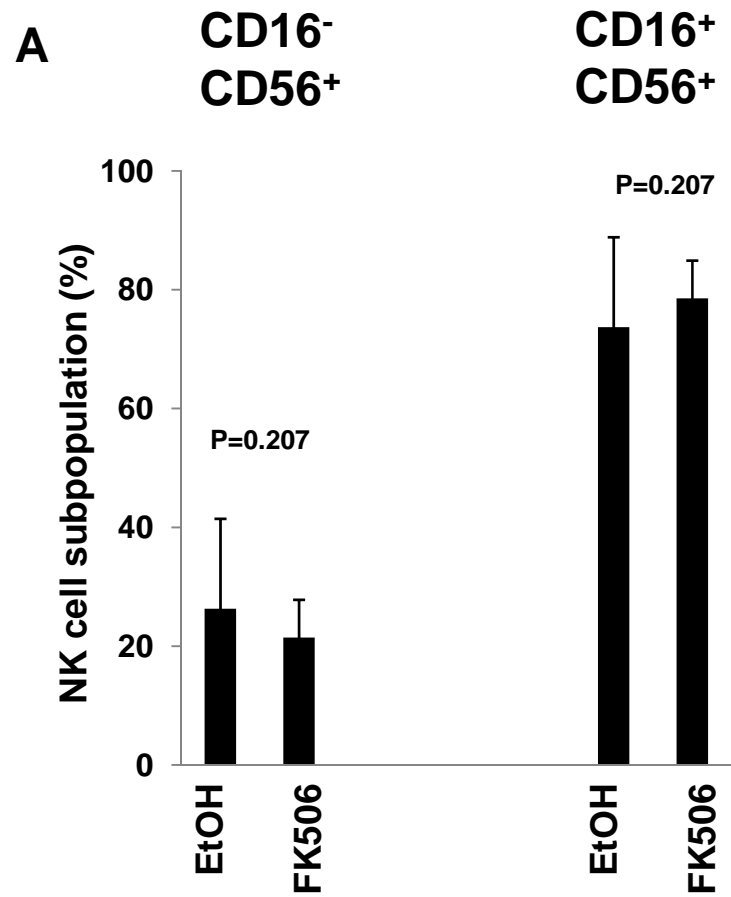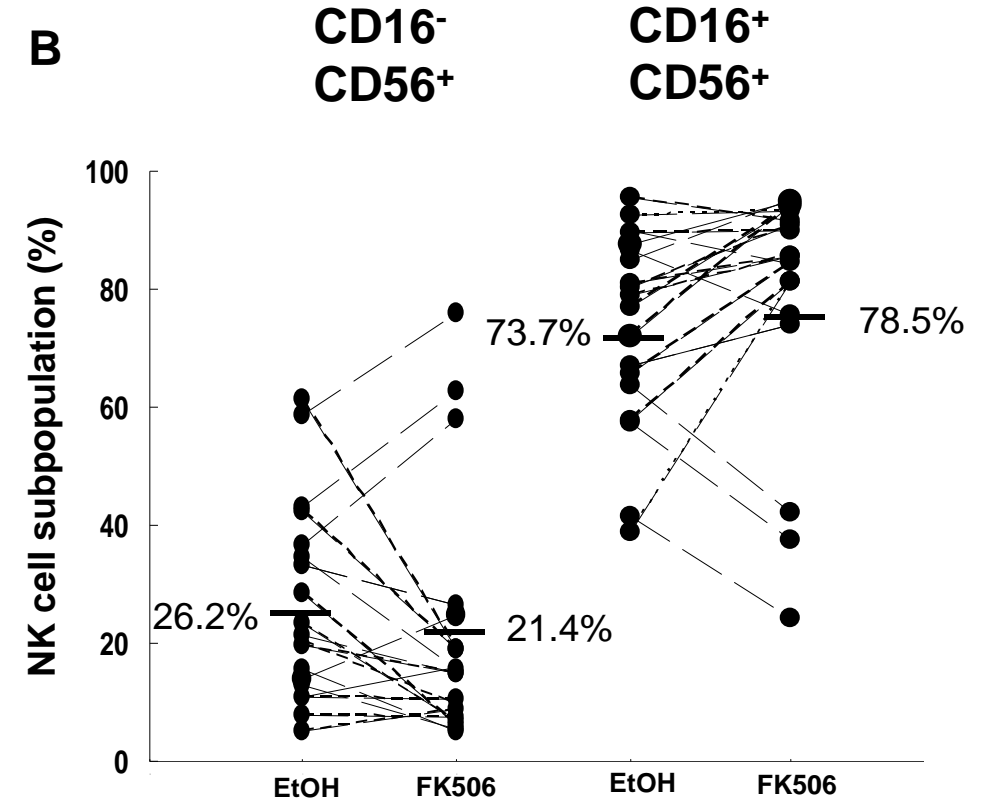

Supplement: JLB-88-1089-s001.pdf [file JLB-88-1089-s001.pdf]
